# Supplementary material for: The initial reaction mechanism and thermal sensitivity of a fluoropolymer-containing energetic molecular system: the coupling effect of interfacial interactions and free radical reactions
Source: Royal Society of Chemistry journal article supplement (doi:10.1039/d0ce01681k), 2021-01-01
Supplement: d0ce01681k1.pdf [file d0ce01681k1.pdf]

## Supporting Information

### S11. Selection of crystalline surfaces

Molecular dynamics simulations and Bravais-Friedel Donnay-Harker (BFDH) method were used to predict the crystal habit for  $\alpha$ -RDX,  $\beta$ -HMX and  $\epsilon$ -CL-20 (Fig. S1, Table S1). The final chosen crystalline directions were considered only about total facet area, but also about the total anisotropy.

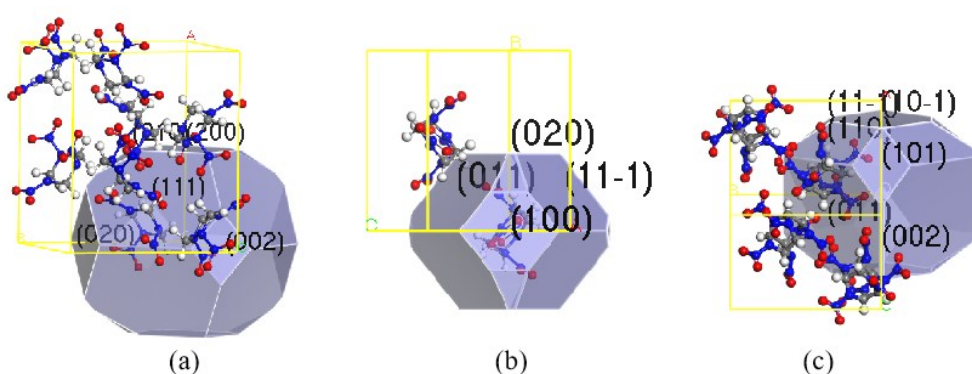

**Fig. S1** Crystal structure and main growth faces for  $\alpha$ -RDX (a),  $\beta$ -HMX (b) and  $\epsilon$ -CL-20 (c)

**Table S1** Crystal habits for  $\alpha$ -RDX,  $\beta$ -HMX and  $\epsilon$ -CL-20

| hkl            | Multiplicity | dhkl   | Distance | Total facet area | % Total facet area |
|----------------|--------------|--------|----------|------------------|--------------------|
| RDX (1 1 1)    | 8            | 6.7513 | 14.8120  | 2849.7870        | 74.08              |
| RDX (2 0 0)    | 2            | 6.5910 | 15.1722  | 495.7448         | 12.89              |
| RDX (0 2 0)    | 2            | 5.7870 | 17.2801  | 277.4410         | 7.21               |
| RDX (2 1 0)    | 4            | 5.7274 | 17.4598  | 100.3021         | 2.61               |
| RDX (0 0 2)    | 2            | 5.3545 | 18.6759  | 123.5935         | 3.21               |
| HMX (0 1 1)    | 4            | 6.0248 | 16.5980  | 2076.4910        | 39.96              |
| HMX (0 2 0)    | 2            | 5.5250 | 18.0995  | 686.8502         | 13.22              |
| HMX (1 1 -1)   | 4            | 5.5230 | 18.1061  | 1620.2130        | 31.18              |
| HMX (1 0 0)    | 2            | 5.4027 | 18.5093  | 563.2068         | 10.84              |
| HMX (1 1 0)    | 4            | 4.8536 | 20.6032  | 196.2668         | 3.78               |
| CL-20 (0 1 1)  | 4            | 8.9680 | 11.1507  | 1548.8370        | 56.41              |
| CL-20 (1 0 -1) | 2            | 8.2511 | 12.1196  | 510.7743         | 18.60              |
| CL-20 (1 1 0)  | 4            | 7.0236 | 14.2377  | 428.9399         | 15.62              |
| CL-20 (1 1 -1) | 4            | 6.8955 | 14.5023  | 117.3673         | 4.27               |
| CL-20 (0 0 2)  | 2            | 6.4067 | 15.6087  | 17.5760          | 0.64               |

SI2. Profiles of potential energies versus time

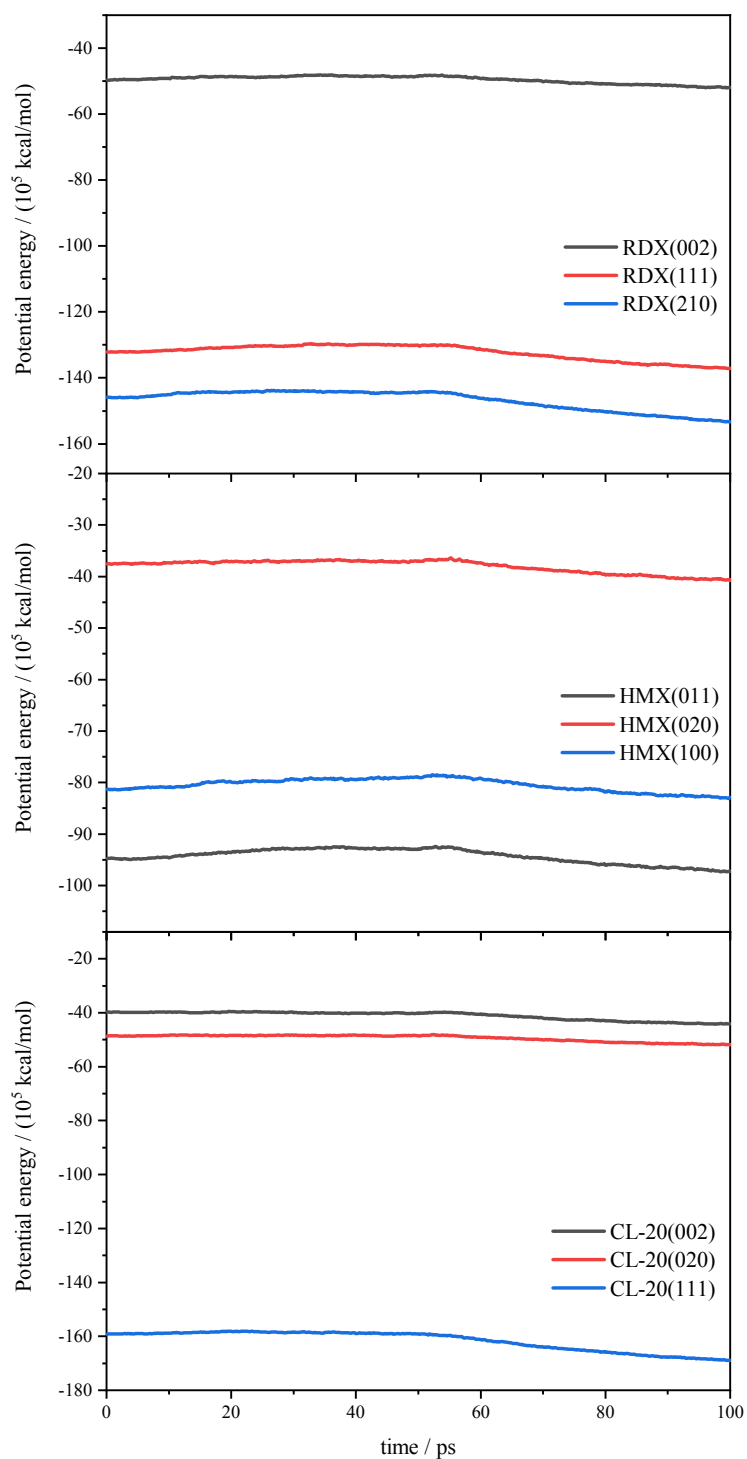

**Fig. S2** Comparison of potential energy evolution for heated energetic composites, including  $F_{2311}$  on RDX, HMX and CL-20 surfaces.

SI3. Profiles of highest frequent primary reactions

**Table S2** Highest frequent primary reactions for pure RDX and RDX interfaces

| Systems                       | Frequencies: the first 10 primary reactions                                                                                                                                                                                                                                                                                                                                                                                                                                                                                                                                                                                                                                                                                                                                                          |                                                                                                                                                                                                                                                                                                                                                                                                                                                                                                                                                                                                                                                                                                                                                                                                                                                                                                                                                                                                                                                                                                                        |
|-------------------------------|------------------------------------------------------------------------------------------------------------------------------------------------------------------------------------------------------------------------------------------------------------------------------------------------------------------------------------------------------------------------------------------------------------------------------------------------------------------------------------------------------------------------------------------------------------------------------------------------------------------------------------------------------------------------------------------------------------------------------------------------------------------------------------------------------|------------------------------------------------------------------------------------------------------------------------------------------------------------------------------------------------------------------------------------------------------------------------------------------------------------------------------------------------------------------------------------------------------------------------------------------------------------------------------------------------------------------------------------------------------------------------------------------------------------------------------------------------------------------------------------------------------------------------------------------------------------------------------------------------------------------------------------------------------------------------------------------------------------------------------------------------------------------------------------------------------------------------------------------------------------------------------------------------------------------------|
|                               | RDX interfaces                                                                                                                                                                                                                                                                                                                                                                                                                                                                                                                                                                                                                                                                                                                                                                                       | Pure RDX                                                                                                                                                                                                                                                                                                                                                                                                                                                                                                                                                                                                                                                                                                                                                                                                                                                                                                                                                                                                                                                                                                               |
| F <sub>2311</sub> /RDX(0 0 2) | 61 : CO + F → COF<br>59 : C <sub>3</sub> H <sub>6</sub> O <sub>6</sub> N <sub>6</sub> → C <sub>3</sub> H <sub>6</sub> O <sub>4</sub> N <sub>5</sub> + NO <sub>2</sub><br>41 : CN + F → CNF<br>24 : 2F → F <sub>2</sub><br>23 : CNF + F → CNF <sub>2</sub><br>21 : CHF <sub>2</sub> + F → CHF <sub>3</sub><br>20 : H + OH → H <sub>2</sub> O<br>19 : H + NO <sub>2</sub> → HO <sub>2</sub> N<br>18 : CH <sub>2</sub> F + F → CH <sub>2</sub> F <sub>2</sub><br>17 : C <sub>3</sub> H <sub>6</sub> O <sub>4</sub> N <sub>5</sub> → C <sub>3</sub> H <sub>6</sub> O <sub>2</sub> N <sub>4</sub> + NO <sub>2</sub>                                                                                                                                                                                       | 185 : C <sub>3</sub> H <sub>6</sub> O <sub>6</sub> N <sub>6</sub> → C <sub>3</sub> H <sub>6</sub> O <sub>4</sub> N <sub>5</sub> + NO <sub>2</sub><br>140 : C <sub>3</sub> H <sub>6</sub> O <sub>4</sub> N <sub>5</sub> → C <sub>3</sub> H <sub>6</sub> O <sub>2</sub> N <sub>4</sub> + NO <sub>2</sub><br>110 : C <sub>3</sub> H <sub>6</sub> O <sub>2</sub> N <sub>4</sub> → C <sub>3</sub> H <sub>6</sub> N <sub>3</sub> + NO <sub>2</sub><br>31 : HNO <sub>2</sub> → OH + NO<br>29 : C <sub>3</sub> H <sub>6</sub> N <sub>3</sub> + NO <sub>2</sub> → C <sub>3</sub> H <sub>5</sub> N <sub>3</sub> + HNO <sub>2</sub><br>26 : C <sub>3</sub> H <sub>6</sub> O <sub>4</sub> N <sub>5</sub> → C <sub>3</sub> H <sub>6</sub> N <sub>3</sub> + 2NO <sub>2</sub><br>26 : H <sub>2</sub> NO <sub>2</sub> → H <sub>2</sub> O + NO<br>25 : C <sub>3</sub> H <sub>6</sub> O <sub>6</sub> N <sub>6</sub> → C <sub>3</sub> H <sub>6</sub> O <sub>2</sub> N <sub>4</sub> + 2NO <sub>2</sub><br>18 : HNO + NO <sub>2</sub> → HNO <sub>2</sub> + NO<br>16 : HNO <sub>2</sub> + ON → HN <sub>2</sub> O <sub>3</sub>                |
| F <sub>2311</sub> /RDX(1 1 1) | 216 : C <sub>3</sub> H <sub>6</sub> O <sub>6</sub> N <sub>6</sub> → C <sub>3</sub> H <sub>6</sub> O <sub>4</sub> N <sub>5</sub> + NO <sub>2</sub><br>118 : CO + F → COF<br>76 : CN + F → CNF<br>59 : C <sub>3</sub> H <sub>6</sub> O <sub>4</sub> N <sub>5</sub> → C <sub>3</sub> H <sub>6</sub> O <sub>2</sub> N <sub>4</sub> + NO <sub>2</sub><br>51 : H + NO <sub>2</sub> → HNO <sub>2</sub><br>51 : CO <sub>2</sub> + F → CO <sub>2</sub> F<br>49 : HNO <sub>2</sub> → HO + NO<br>44 : H <sub>2</sub> NO <sub>2</sub> → H <sub>2</sub> O + NO<br>43 : H + HO → H <sub>2</sub> O<br>43 : CHN + F → CHNF                                                                                                                                                                                           | 542 : C <sub>3</sub> H <sub>6</sub> O <sub>6</sub> N <sub>6</sub> → C <sub>3</sub> H <sub>6</sub> O <sub>4</sub> N <sub>5</sub> + NO <sub>2</sub><br>371 : C <sub>3</sub> H <sub>6</sub> O <sub>4</sub> N <sub>5</sub> → C <sub>3</sub> H <sub>6</sub> O <sub>2</sub> N <sub>4</sub> + NO <sub>2</sub><br>272 : C <sub>3</sub> H <sub>6</sub> O <sub>2</sub> N <sub>4</sub> → C <sub>3</sub> H <sub>6</sub> N <sub>3</sub> + NO <sub>2</sub><br>126 : 2NO → N <sub>2</sub> O <sub>2</sub><br>89 : H <sub>2</sub> NO <sub>2</sub> → H <sub>2</sub> O + NO<br>73 : C <sub>3</sub> H <sub>6</sub> O <sub>6</sub> N <sub>6</sub> → C <sub>3</sub> H <sub>6</sub> O <sub>2</sub> N <sub>4</sub> + 2NO <sub>2</sub><br>73 : C <sub>3</sub> H <sub>6</sub> O <sub>4</sub> N <sub>5</sub> → C <sub>3</sub> H <sub>6</sub> N <sub>3</sub> + 2NO <sub>2</sub><br>67 : C <sub>3</sub> H <sub>6</sub> N <sub>3</sub> + NO <sub>2</sub> → C <sub>3</sub> H <sub>5</sub> N <sub>3</sub> + HO <sub>2</sub> N<br>63 : HNO <sub>2</sub> → OH + NO<br>52 : HNO + NO <sub>2</sub> → HNO <sub>2</sub> + NO                                 |
| F <sub>2311</sub> /RDX(2 1 0) | 302 : C <sub>3</sub> H <sub>6</sub> O <sub>6</sub> N <sub>6</sub> → C <sub>3</sub> H <sub>6</sub> O <sub>4</sub> N <sub>5</sub> + NO <sub>2</sub><br>135 : CO + F → COF<br>103 : C <sub>3</sub> H <sub>6</sub> O <sub>4</sub> N <sub>5</sub> → C <sub>3</sub> H <sub>6</sub> O <sub>2</sub> N <sub>4</sub> + NO <sub>2</sub><br>103 : CN + F → CNF<br>46 : HNO <sub>2</sub> → HO + NO<br>45 : C <sub>3</sub> H <sub>6</sub> O <sub>2</sub> N <sub>4</sub> → C <sub>3</sub> H <sub>6</sub> N <sub>3</sub> + NO <sub>2</sub><br>45 : CO <sub>2</sub> + F → CO <sub>2</sub> F<br>41 : CHN + F → CHNF<br>39 : H + NO <sub>2</sub> → HNO <sub>2</sub><br>37 : C <sub>3</sub> H <sub>6</sub> O <sub>5</sub> N <sub>6</sub> → C <sub>3</sub> H <sub>6</sub> O <sub>3</sub> N <sub>5</sub> + NO <sub>2</sub> | 609 : C <sub>3</sub> H <sub>6</sub> O <sub>6</sub> N <sub>6</sub> → C <sub>3</sub> H <sub>6</sub> O <sub>4</sub> N <sub>5</sub> + NO <sub>2</sub><br>405 : C <sub>3</sub> H <sub>6</sub> O <sub>4</sub> N <sub>5</sub> → C <sub>3</sub> H <sub>6</sub> O <sub>2</sub> N <sub>4</sub> + NO <sub>2</sub><br>283 : C <sub>3</sub> H <sub>6</sub> O <sub>2</sub> N <sub>4</sub> → C <sub>3</sub> H <sub>6</sub> N <sub>3</sub> + NO <sub>2</sub><br>102 : C <sub>3</sub> H <sub>6</sub> O <sub>4</sub> N <sub>5</sub> → C <sub>3</sub> H <sub>6</sub> N <sub>3</sub> + 2NO <sub>2</sub><br>94 : C <sub>3</sub> H <sub>6</sub> O <sub>6</sub> N <sub>6</sub> → C <sub>3</sub> H <sub>6</sub> O <sub>2</sub> N <sub>4</sub> + 2NO <sub>2</sub><br>86 : C <sub>3</sub> H <sub>6</sub> N <sub>3</sub> + NO <sub>2</sub> → C <sub>3</sub> H <sub>5</sub> N <sub>3</sub> + HNO <sub>2</sub><br>86 : H <sub>2</sub> NO <sub>2</sub> → H <sub>2</sub> O + NO<br>84 : HNO <sub>2</sub> → OH + NO<br>79 : HNO + NO <sub>2</sub> → HNO <sub>2</sub> + NO<br>51 : H <sub>2</sub> NO <sub>2</sub> + NO <sub>2</sub> → 2HNO <sub>2</sub> |

**Table S3** Highest frequent primary reactions for pure HMX and HMX interfaces

| Systems                       | Frequencies: the first 10 primary reactions                                                                                                        |                                                                                                                                                   |
|-------------------------------|----------------------------------------------------------------------------------------------------------------------------------------------------|---------------------------------------------------------------------------------------------------------------------------------------------------|
|                               | HMX interfaces                                                                                                                                     | Pure HMX                                                                                                                                          |
| F <sub>2311</sub> /HMX(0 1 1) | 126 : CO + F → COF                                                                                                                                 | 284 : C <sub>4</sub> H <sub>8</sub> O <sub>8</sub> N <sub>8</sub> → C <sub>4</sub> H <sub>8</sub> O <sub>6</sub> N <sub>7</sub> + NO <sub>2</sub> |
|                               | 89 : C <sub>4</sub> H <sub>8</sub> O <sub>8</sub> N <sub>8</sub> → C <sub>4</sub> H <sub>8</sub> O <sub>6</sub> N <sub>7</sub> + NO <sub>2</sub>   | 193 : C <sub>4</sub> H <sub>8</sub> O <sub>6</sub> N <sub>7</sub> → C <sub>4</sub> H <sub>8</sub> O <sub>4</sub> N <sub>6</sub> + NO <sub>2</sub> |
|                               | 71 : CN + F → CNF                                                                                                                                  | 132 : C <sub>4</sub> H <sub>8</sub> O <sub>4</sub> N <sub>6</sub> → C <sub>4</sub> H <sub>8</sub> O <sub>2</sub> N <sub>5</sub> + NO <sub>2</sub> |
|                               | 33 : COF + F → COF <sub>2</sub>                                                                                                                    | 85 : C <sub>4</sub> H <sub>8</sub> O <sub>2</sub> N <sub>5</sub> → C <sub>4</sub> H <sub>8</sub> N <sub>4</sub> + NO <sub>2</sub>                 |
|                               | 30 : H + H <sub>2</sub> O → H <sub>3</sub> O                                                                                                       | 64 : HNO <sub>2</sub> → OH + NO                                                                                                                   |
|                               | 27 : H + NO <sub>2</sub> → HNO                                                                                                                     | 53 : HNO + NO <sub>2</sub> → HNO <sub>2</sub> + NO                                                                                                |
|                               | 26 : CNF + F → CNF <sub>2</sub>                                                                                                                    | 52 : C <sub>4</sub> H <sub>8</sub> O <sub>6</sub> N <sub>7</sub> → C <sub>4</sub> H <sub>8</sub> O <sub>2</sub> N <sub>5</sub> + 2NO <sub>2</sub> |
|                               | 24 : C <sub>4</sub> H <sub>8</sub> O <sub>6</sub> N <sub>7</sub> → C <sub>4</sub> H <sub>8</sub> O <sub>4</sub> N <sub>6</sub> + NO <sub>2</sub>   | 51 : C <sub>4</sub> H <sub>8</sub> O <sub>8</sub> N <sub>8</sub> → C <sub>4</sub> H <sub>8</sub> O <sub>4</sub> N <sub>6</sub> + 2NO <sub>2</sub> |
|                               | 22 : C <sub>2</sub> + F → C <sub>2</sub> F                                                                                                         | 50 : H <sub>2</sub> NO <sub>2</sub> → H <sub>2</sub> O + NO                                                                                       |
|                               | 22 : CO <sub>2</sub> + F → CO <sub>2</sub> F                                                                                                       | 46 : C <sub>4</sub> H <sub>8</sub> O <sub>4</sub> N <sub>6</sub> → C <sub>4</sub> H <sub>8</sub> N <sub>4</sub> + 2NO <sub>2</sub>                |
| F <sub>2311</sub> /HMX(0 2 0) | 26 : CO + F → COF                                                                                                                                  | 96 : C <sub>4</sub> H <sub>8</sub> O <sub>8</sub> N <sub>8</sub> → C <sub>4</sub> H <sub>8</sub> O <sub>6</sub> N <sub>7</sub> + NO <sub>2</sub>  |
|                               | 13 : 2F → F <sub>2</sub>                                                                                                                           | 66 : C <sub>4</sub> H <sub>8</sub> O <sub>6</sub> N <sub>7</sub> → C <sub>4</sub> H <sub>8</sub> O <sub>4</sub> N <sub>6</sub> + NO <sub>2</sub>  |
|                               | 12 : CNF + F → CNF <sub>2</sub>                                                                                                                    | 52 : C <sub>4</sub> H <sub>8</sub> O <sub>4</sub> N <sub>6</sub> → C <sub>4</sub> H <sub>8</sub> O <sub>2</sub> N <sub>5</sub> + NO <sub>2</sub>  |
|                               | 12 : CF <sub>2</sub> + F → CF <sub>3</sub>                                                                                                         | 38 : C <sub>4</sub> H <sub>8</sub> O <sub>2</sub> N <sub>5</sub> → C <sub>4</sub> H <sub>8</sub> N <sub>4</sub> + NO <sub>2</sub>                 |
|                               | 9 : CO <sub>2</sub> + F → CO <sub>2</sub> F                                                                                                        | 28 : H <sub>2</sub> NO <sub>2</sub> → H <sub>2</sub> O + NO                                                                                       |
|                               | 9 : COF + F → COF <sub>2</sub>                                                                                                                     | 24 : C <sub>4</sub> H <sub>8</sub> O <sub>6</sub> N <sub>7</sub> → C <sub>4</sub> H <sub>8</sub> O <sub>2</sub> N <sub>5</sub> + 2NO <sub>2</sub> |
|                               | 8 : C <sub>4</sub> H <sub>9</sub> O <sub>8</sub> N <sub>8</sub> → C <sub>4</sub> H <sub>9</sub> O <sub>6</sub> N <sub>7</sub> + NO <sub>2</sub>    | 21 : C <sub>4</sub> H <sub>8</sub> O <sub>8</sub> N <sub>8</sub> → C <sub>4</sub> H <sub>8</sub> O <sub>4</sub> N <sub>6</sub> + 2NO <sub>2</sub> |
|                               | 8 : CN + F → CNF                                                                                                                                   | 17 : C <sub>4</sub> H <sub>8</sub> O <sub>4</sub> N <sub>6</sub> → C <sub>4</sub> H <sub>8</sub> N <sub>4</sub> + 2NO <sub>2</sub>                |
|                               | 8 : CHF <sub>2</sub> + F → CHF <sub>3</sub>                                                                                                        | 17 : C <sub>4</sub> H <sub>8</sub> N <sub>4</sub> + NO <sub>2</sub> → C <sub>4</sub> H <sub>7</sub> N <sub>4</sub> + HNO <sub>2</sub>             |
|                               | 6 : C <sub>3</sub> F <sub>2</sub> + F → C <sub>3</sub> F <sub>3</sub>                                                                              | 14 : NO <sub>2</sub> + NO → N <sub>2</sub> O <sub>3</sub>                                                                                         |
| F <sub>2311</sub> /HMX(1 0 0) | 71 : CO + F → COF                                                                                                                                  | 234 : C <sub>4</sub> H <sub>8</sub> O <sub>8</sub> N <sub>8</sub> → C <sub>4</sub> H <sub>8</sub> O <sub>6</sub> N <sub>7</sub> + NO <sub>2</sub> |
|                               | 44 : C <sub>4</sub> H <sub>8</sub> O <sub>8</sub> N <sub>8</sub> → C <sub>4</sub> H <sub>8</sub> O <sub>6</sub> N <sub>7</sub> + NO <sub>2</sub>   | 161 : C <sub>4</sub> H <sub>8</sub> O <sub>6</sub> N <sub>7</sub> → C <sub>4</sub> H <sub>8</sub> O <sub>4</sub> N <sub>6</sub> + NO <sub>2</sub> |
|                               | 43 : CN + F → CNF                                                                                                                                  | 102 : C <sub>4</sub> H <sub>8</sub> O <sub>4</sub> N <sub>6</sub> → C <sub>4</sub> H <sub>8</sub> O <sub>2</sub> N <sub>5</sub> + NO <sub>2</sub> |
|                               | 40 : COF + F → COF <sub>2</sub>                                                                                                                    | 47 : 2NO → N <sub>2</sub> O <sub>2</sub>                                                                                                          |
|                               | 30 : CO <sub>2</sub> + F → CO <sub>2</sub> F                                                                                                       | 43 : C <sub>4</sub> H <sub>8</sub> O <sub>2</sub> N <sub>5</sub> → C <sub>4</sub> H <sub>8</sub> N <sub>4</sub> + NO <sub>2</sub>                 |
|                               | 25 : C <sub>4</sub> H <sub>9</sub> O <sub>8</sub> N <sub>8</sub> → C <sub>4</sub> H <sub>8</sub> O <sub>6</sub> N <sub>7</sub> + HO <sub>2</sub> N | 41 : HNO + NO <sub>2</sub> → HNO <sub>2</sub> + NO                                                                                                |
|                               | 23 : HNO <sub>2</sub> → HO + NO                                                                                                                    | 39 : C <sub>4</sub> H <sub>8</sub> O <sub>6</sub> N <sub>7</sub> → C <sub>4</sub> H <sub>8</sub> O <sub>2</sub> N <sub>5</sub> + 2NO <sub>2</sub> |
|                               | 22 : H + H <sub>2</sub> O → H <sub>3</sub> O                                                                                                       | 34 : HNO <sub>2</sub> → OH + NO                                                                                                                   |
|                               | 22 : CNF + F → CNF <sub>2</sub>                                                                                                                    | 33 : C <sub>4</sub> H <sub>8</sub> O <sub>8</sub> N <sub>8</sub> → C <sub>4</sub> H <sub>8</sub> O <sub>4</sub> N <sub>6</sub> + 2NO <sub>2</sub> |
|                               | 22 : 2F → F <sub>2</sub>                                                                                                                           | 33 : H <sub>2</sub> NO <sub>2</sub> → H <sub>2</sub> O + NO                                                                                       |
